# Supplementary material for: Eco-friendly floatable foam hydrogel for the adsorption of heavy metal ions and use of the generated waste for the catalytic reduction of organic dyes
Source: Royal Society of Chemistry journal article supplement (doi:10.1039/d0sm00756k), 2020-01-01
Supplement: d0sm00756k1.pdf [file d0sm00756k1.pdf]

## Supporting information

### **Eco-friendly floatable foam hydrogel for the adsorption of heavy metal ions and the generated waste for the catalytic reduction of organic dyes**

*Hui Zhao, Ying Li\**

Key Laboratory of Colloid and Interface Chemistry of State Education Ministry,

School of Chemistry and Chemical Engineering,

Shandong University, 27 South Road of ShanDa,

Jinan, Shandong 250100, P. R. China

[yingli@sdu.edu.cn](mailto:yingli@sdu.edu.cn)

\* Prof. Dr. Ying Li

School of Chemistry and Chemical Engineering

Shandong University

27 South Road of ShanDa, Jinan, Shandong, P. R. China 250100

Tele: +86-531-88362078

Fax: +86-531-88364464

Email: [yingli@sdu.edu.cn](mailto:yingli@sdu.edu.cn)

**Table S1.** Mathematical expressions of the kinetic models

| Models                         | Mathematical expression                                 | Parameters                                                                                                                                                                  |
|--------------------------------|---------------------------------------------------------|-----------------------------------------------------------------------------------------------------------------------------------------------------------------------------|
| Pseudo-first-order model       | $\ln(q_e - q_t) = \ln q_e - k_1 t$                      | $q_e$ was the equilibrium adsorption capacity (mg/g); $q_t$ was the adsorption capacity at time $t$ ; $k_1$ ( $\text{min}^{-1}$ ) was the pseudo-first order rate constants |
| Pseudo-second-model            | $\frac{t}{q_t} = \frac{1}{k_2 q_e^2} + \frac{1}{q_e} t$ | $k_2$ ( $\text{g}\cdot\text{mg}^{-1}\cdot\text{min}^{-1}$ ) was pseudo-second order rate constants.                                                                         |
| Intra-particle diffusion model | $q_t = K_{id} t^{0.5} + C_i$                            | $K_{id}$ was the intra-particle diffusion rate constants                                                                                                                    |

**Table S2.** Mathematical expressions of the adsorption isotherm models

| Models     | Expression                                              | Parameters                                                                                                                                                                                                                                                 |
|------------|---------------------------------------------------------|------------------------------------------------------------------------------------------------------------------------------------------------------------------------------------------------------------------------------------------------------------|
| Langmuir   | $\frac{C_e}{q_e} = \frac{C_e}{q_m} + \frac{1}{K_L q_m}$ | $C_e$ was the equilibrium concentration of $\text{Cu}^{2+}$ (mg/L); $q_e$ was the equilibrium adsorption capacity of $\text{Cu}^{2+}$ adsorbed onto the hydrogel (mg/g); $q_m$ denoted maximum adsorption capacity; $K_L$ was the Langmuir constant (L/mg) |
| Freundlich | $\ln q_e = \ln K_F + (1/n) \ln C_e$                     | $K_F$ was the Freundlich constant                                                                                                                                                                                                                          |

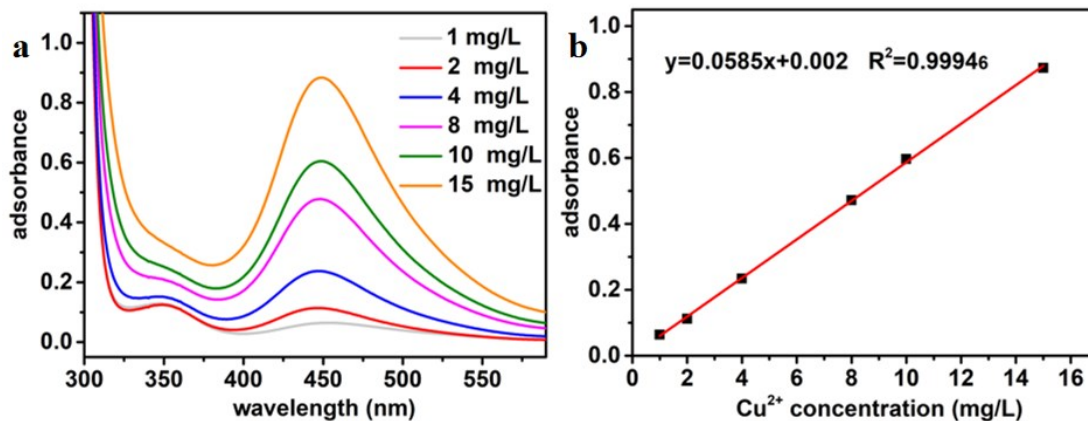

**Figure S1** (a) UV spectrum of Cu<sup>2+</sup>/SDDT (b) standard curve of Cu<sup>2+</sup>/SDDT

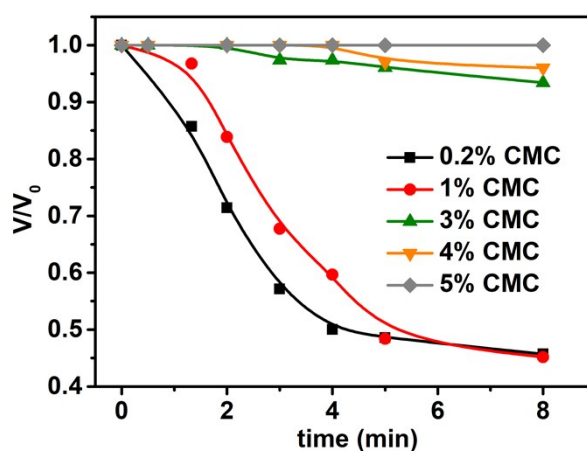

**Figure S2.** Effect of the CMC concentration on the foam stability,  $V$  and  $V_0$  were the volume of the wet foam at time  $t$  and the initial volume of the wet foam, respectively

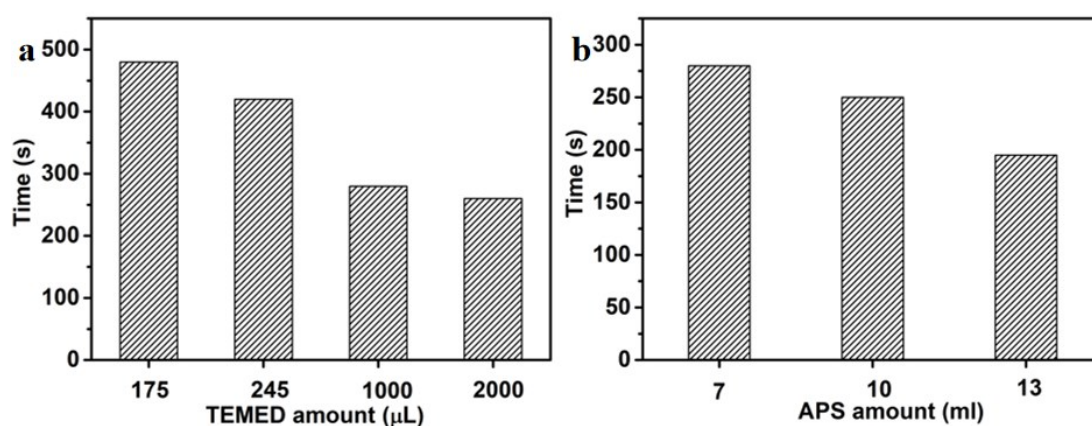

**Figure S3.** Effect of the amount of (a) TEMED and (b) APS on the crosslinking time

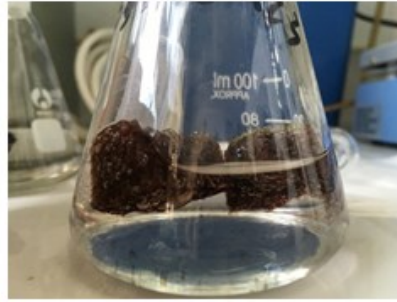

**Figure S4.** Pictures of PAM/CMC/DDM-Cu composite hydrogel

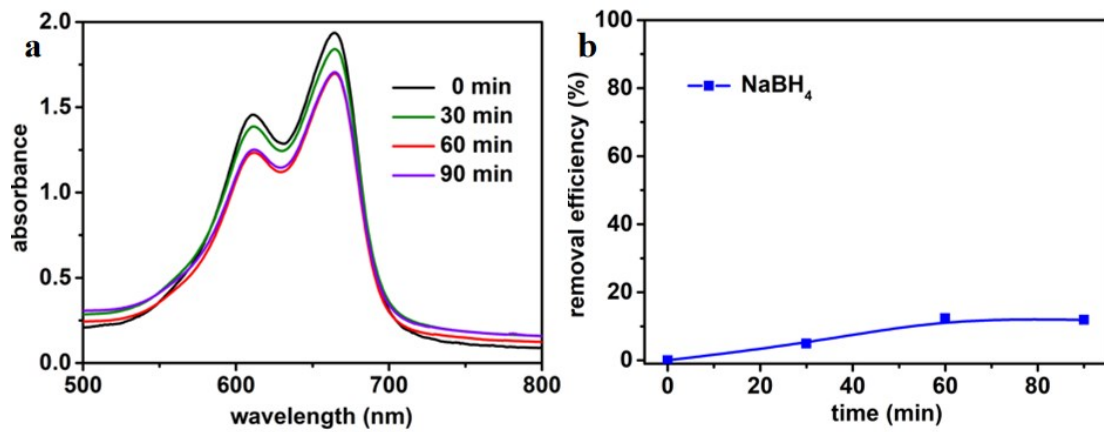

**Figure S5.** (a) UV-vis spectra of MB in the presence of NaBH<sub>4</sub> and (b) the corresponding catalytic reduction efficiency of MB

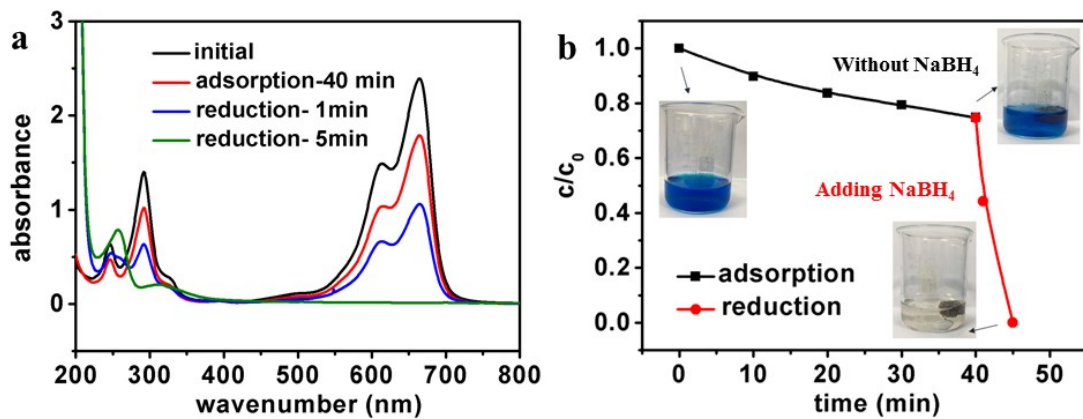

**Figure S6.** (a) UV-vis spectra of MB dye and (b) the temporal evolution in residual amount of MB dye when PAM/CMC/DDM-Cu NPs composite hydrogel added into the system

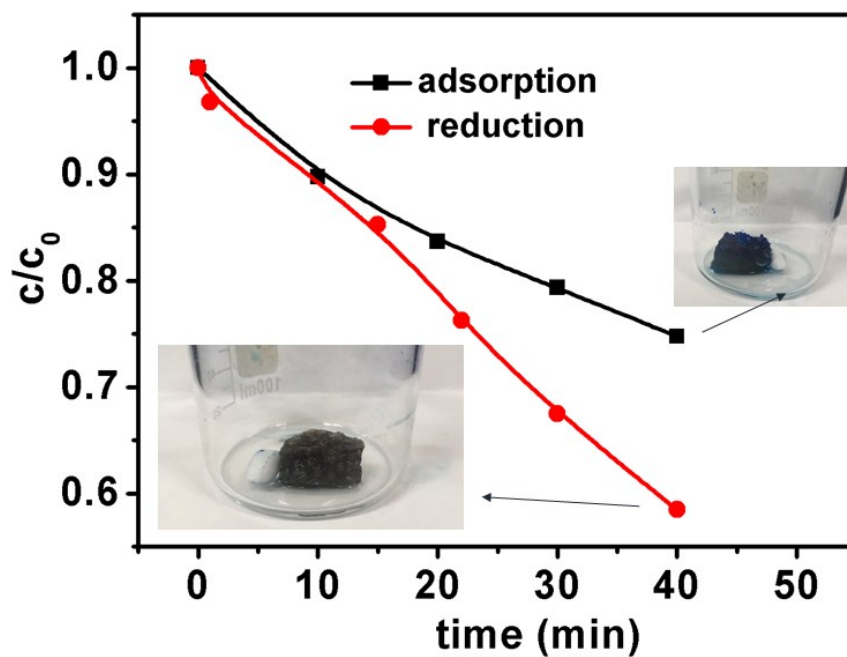

**Figure S7.** The temporal evolution in residual amount of MB dye when PAM/CMC3/DDM-Cu NPs composite hydrogel was added in the absence or presence of  $\text{NaBH}_4$  solution respectively

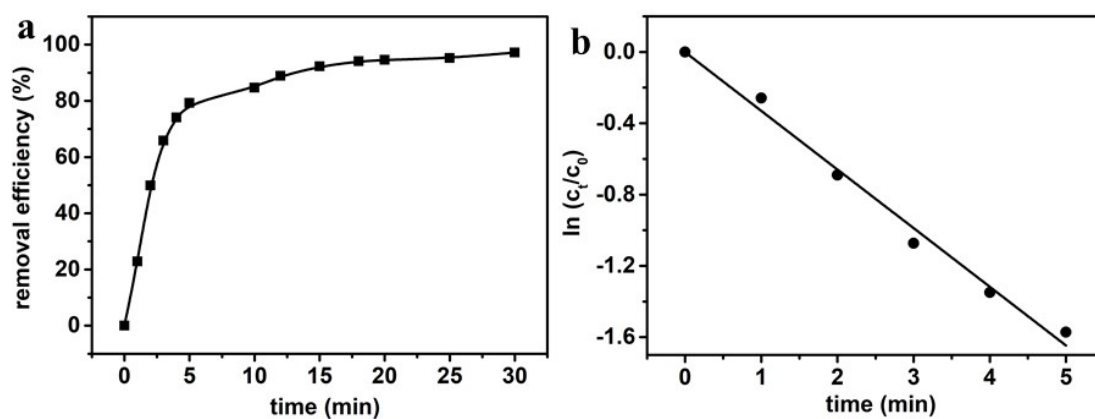

**Figure S8.** (a) Removal efficiency of MO; (b) Plot of  $\ln(c_t/c_0)$  as a function of time
